# Supplementary material for: Guest-induced reversible crystal-to-amorphous-to-crystal transformation in a Co(ii)-based metal–organic framework
Source: Royal Society of Chemistry journal article supplement (doi:10.1039/c8ce01324a), 2018-01-01
Supplement: c8ce01324a1.pdf [file c8ce01324a1.pdf]

*Electronic supplementary information (ESI)*

**Guest-induced Reversible Crystal-to-Amorphous-to-Crystal  
Transformation in a Co(II) Based Metal Organic Framework**

Huiling Tan, Qibin Chen\*, Yujie Sheng, Xiaoxiao Li, Honglai Liu\*

*State Key Laboratory of Chemical Engineering and School of Chemistry & Molecular  
Engineering, East China University of Science and Technology, Shanghai, 200237, P.R. China*

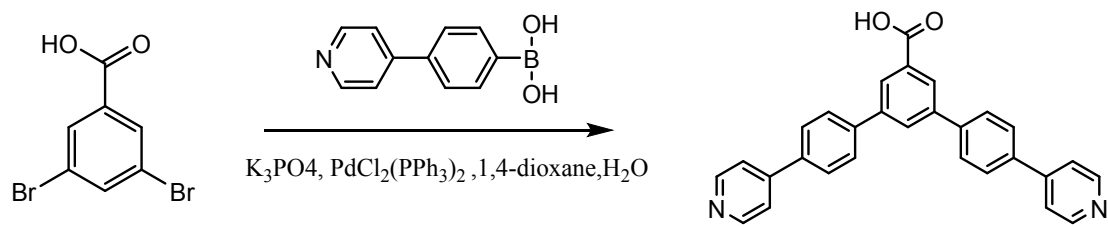

**Scheme S1.** Synthetic scheme for DPPB

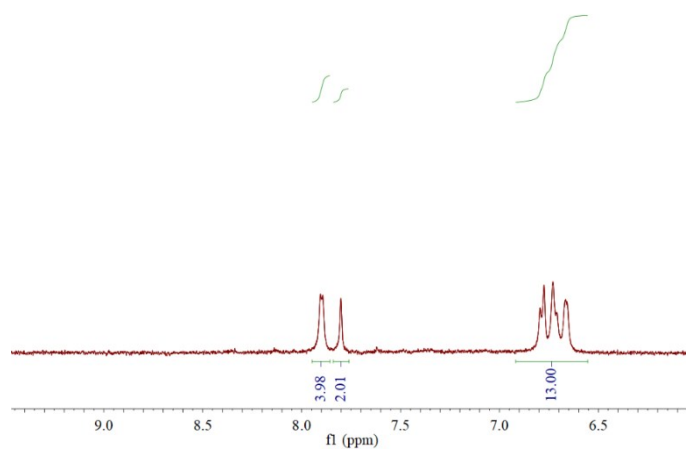

**Fig S1.** <sup>1</sup>H NMR spectrum of DPPB

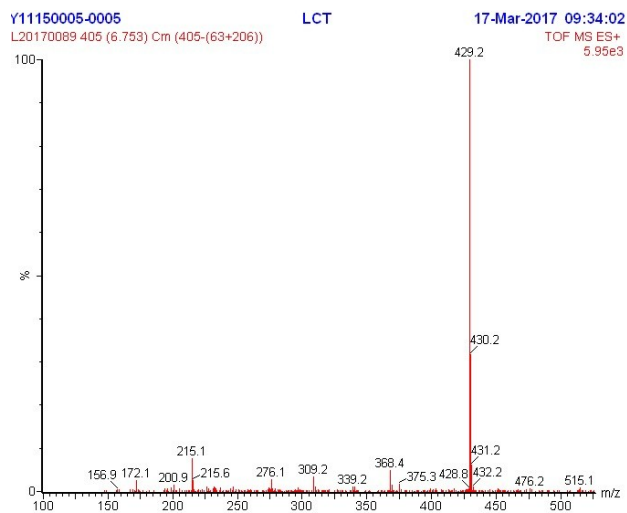

**Fig S2.** Mass spectrum of DPPB

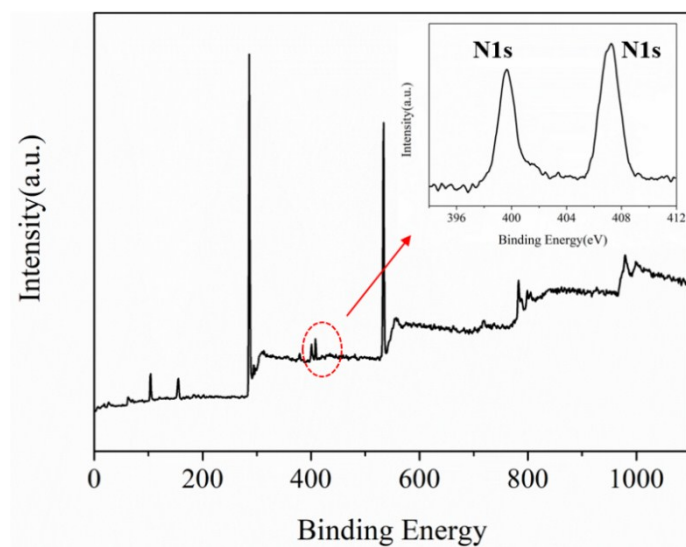

**Fig S3.** XPS spectra of DPPB-1

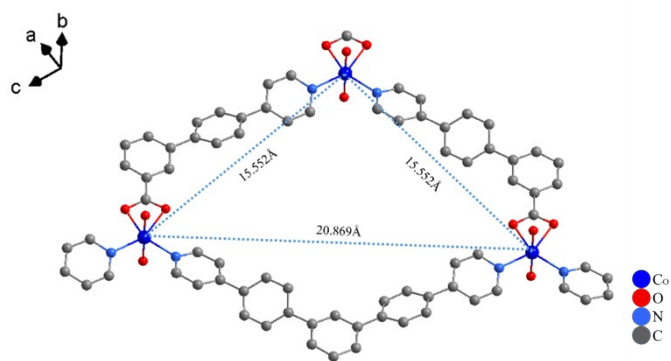

**Fig S4.** Honeycomb-like cavity showing the isosceles triangle formed by the three metal centers with the edge lengths (Co...Co separation) of 15.552 and 20.869 Å.

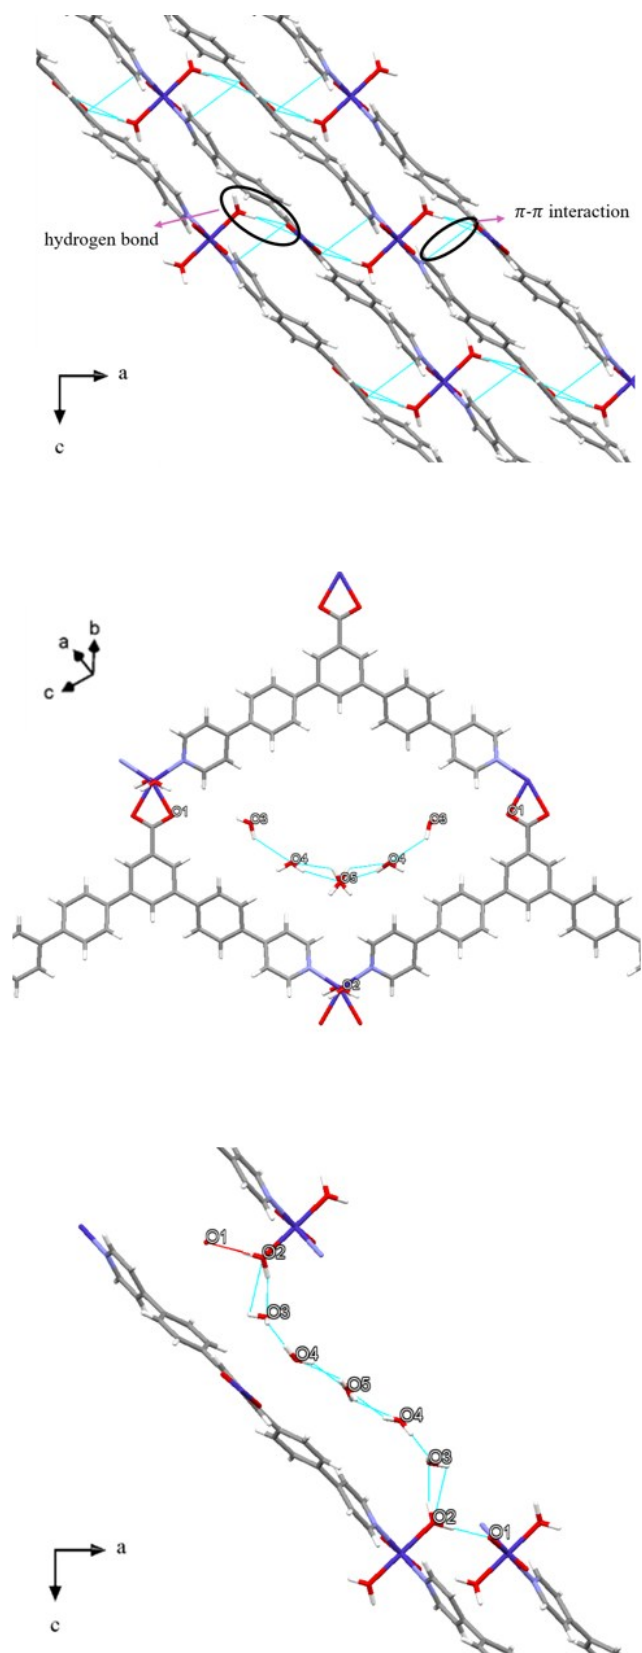

**Fig S5.** Structure view for DPPB-1 along the b axis (a) and c axis (b). Guests are omitted for clarity in a.

Color codes: Co, dark blue; N, light blue; C, grey; O, red.

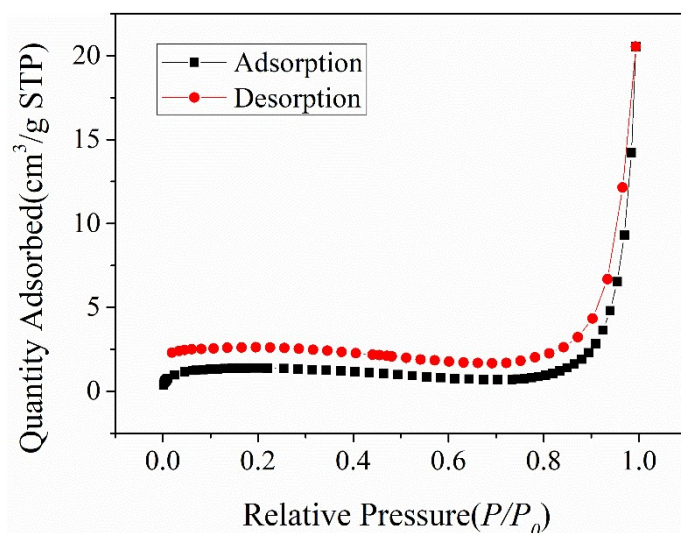

**Fig S6.** The N<sub>2</sub> adsorption-desorption isotherm of DPPB-2 at 77K

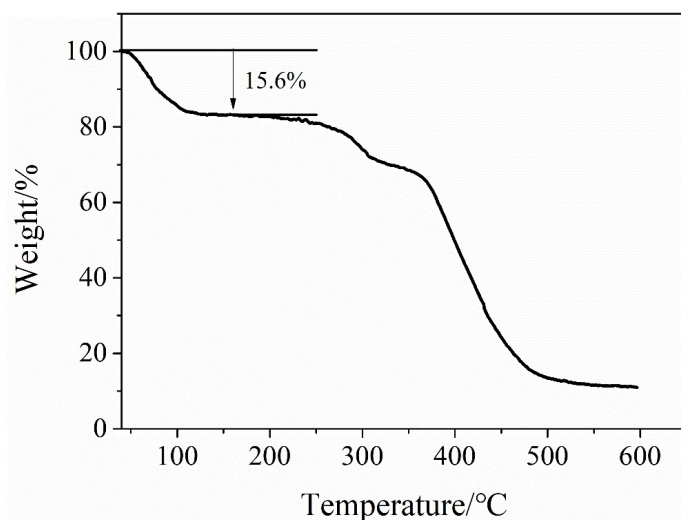

**Fig S7.** TGA curves of DPPB-1

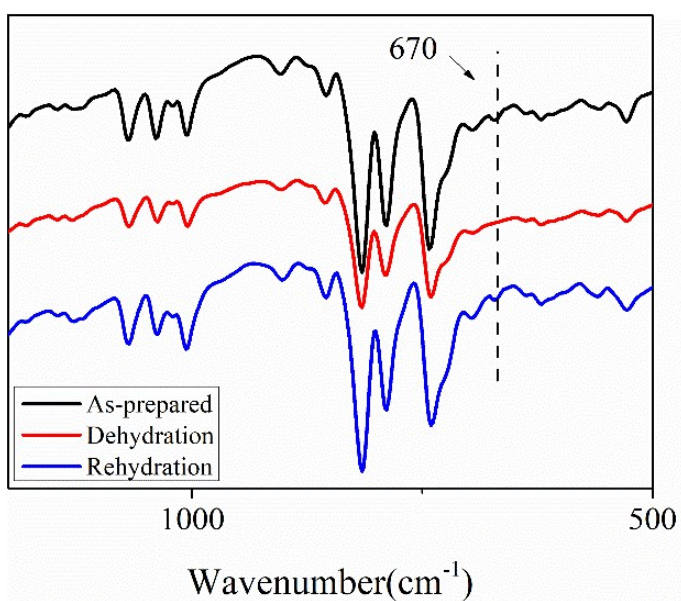

**Fig S8.** IR spectra of DPPB-1 during dehydration and rehydration

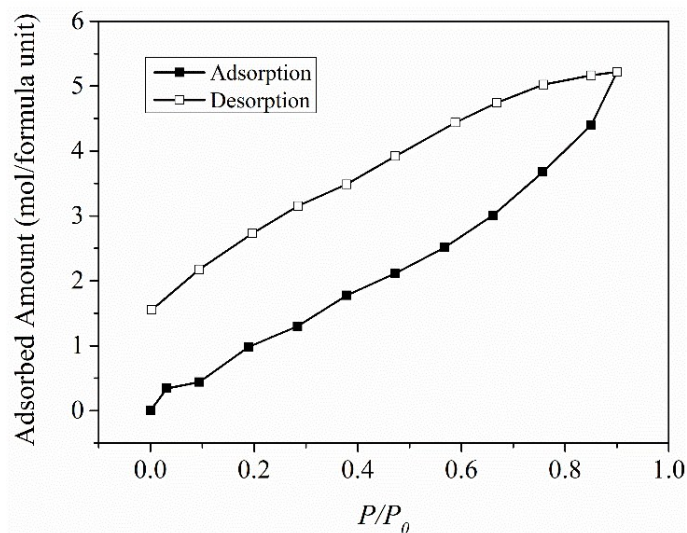

**Fig S9.** The ad/desorption isotherms of DPPB-2 for water at 298 K

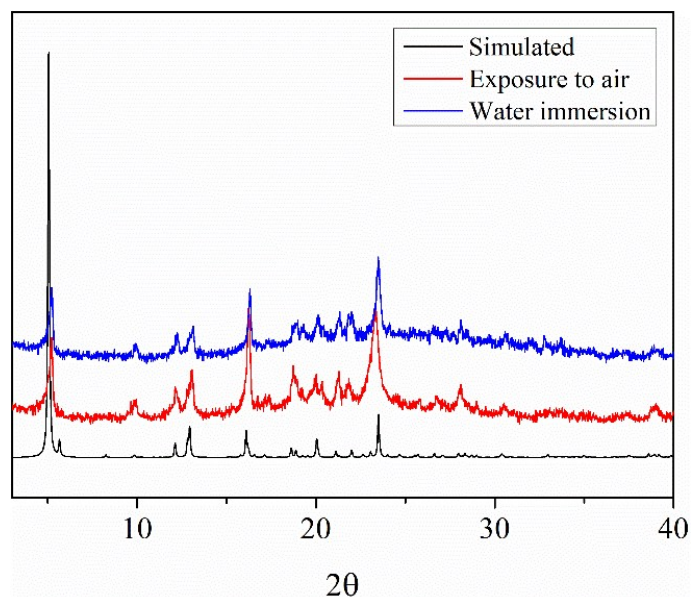

**Fig S10.** The PXRD pattern of DPPB-2 treated by water immersion and exposure to the air

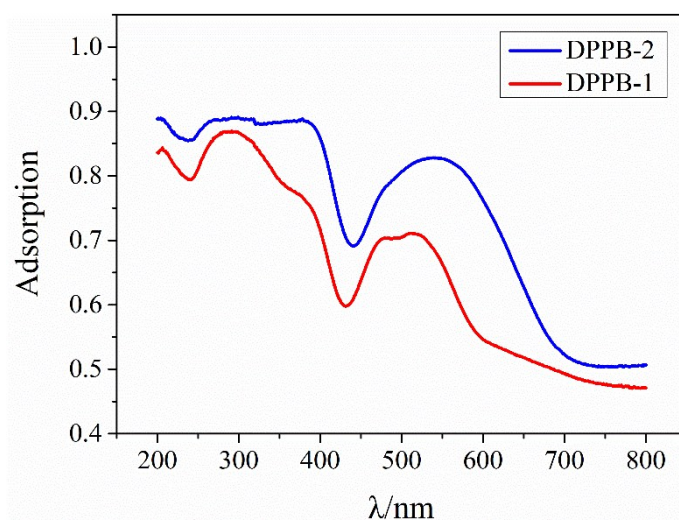

**Fig S11.** Solid UV-visible spectra of DPPB-1 and DPPB-2



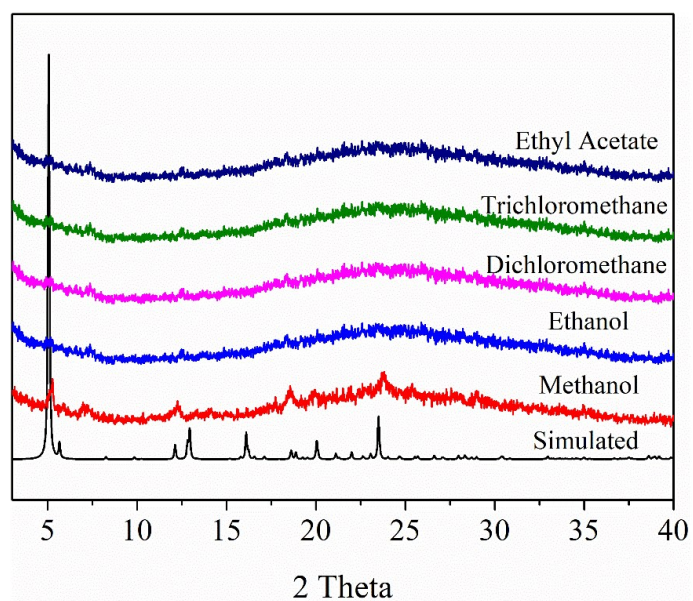

**Fig S12.** The PXR D patterns of DPPB-2 immersed in different solvent

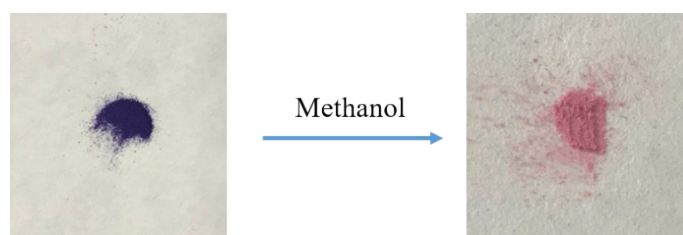

**Fig S13.** Color change of DPPB-2 in methanol

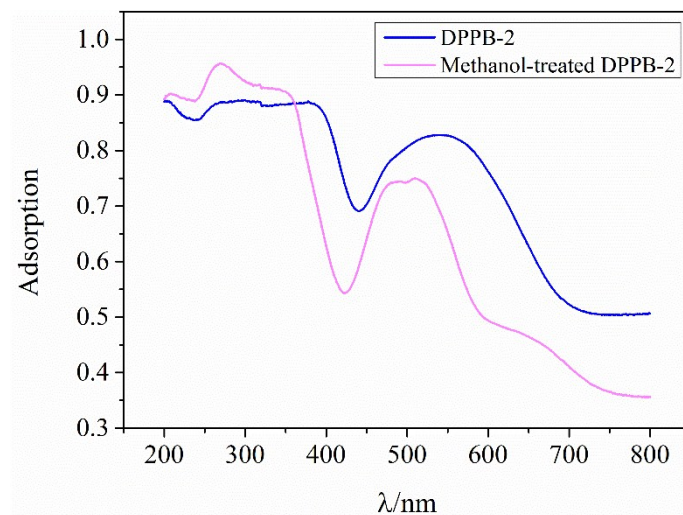

**Fig S14.** Solid UV-visible spectra of DPPB-2 and Methanol-treated DPPB-2

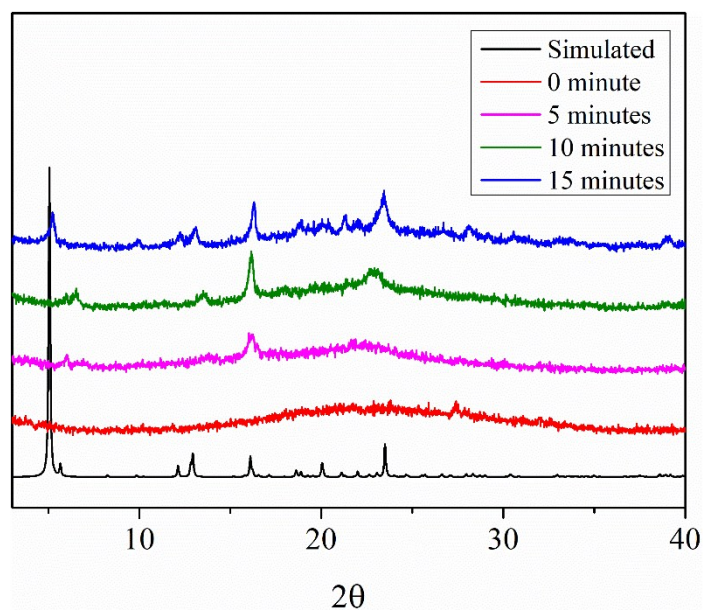

**Fig S15.** The PXR D patterns of DPPB-2 samples immersed in methanol.

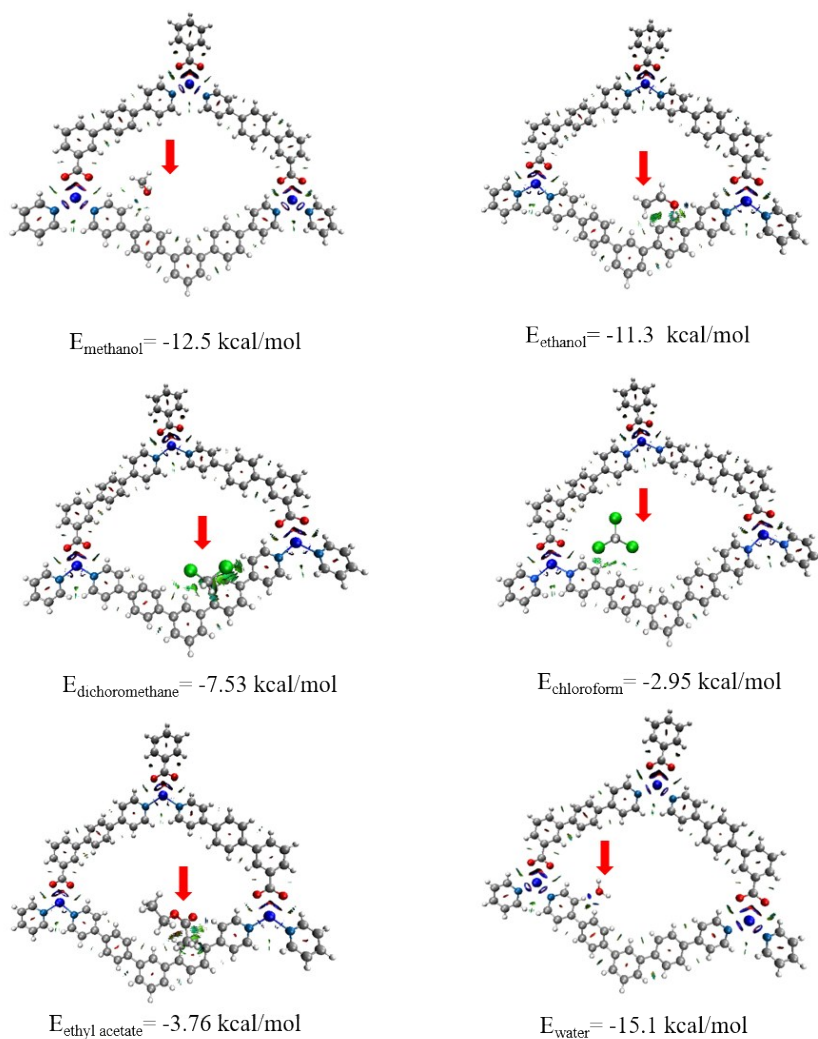

**Fig S16.** Energies and NCI analyses for host-guest interactions between guest molecules and cavity. VOC molecules are mark as red arrows.



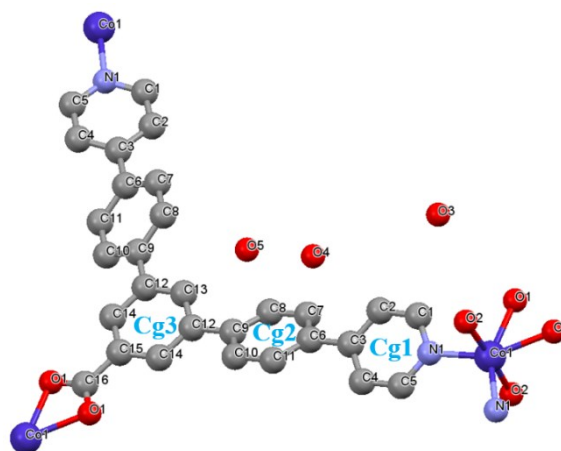

**Fig S17.** The asymmetric unit and atom labeling of scheme of DPPB-1. Guests and hydrogen atoms are omitted for clarity.

**Table S1.** Hydrogen bonds (Å, Deg.) calculated by PLATON software for DPPB-1.

| Donor ---H...Acceptor | D - H | H...A | D...A | D - H...A |
|-----------------------|-------|-------|-------|-----------|
| O(2)---H(1A)...O(3)   | 0.96  | 1.90  | 2.740 | 144       |
| O(2)---H(2B)...O(1)   | 0.96  | 1.82  | 2.757 | 163       |
| O(3)---H(3A)...O(4)   | 0.85  | 2.54  | 3.210 | 136       |
| O(4)---H(4A)...O(5)   | 0.85  | 2.19  | 3.09  | 151       |

**Table S2.** Analysis of short ring-interactions with Cg-Cg Distances < 6.0 Å and Beta < 60.0 Deg. calculated by PLATON software for DPPB-1. Alpha: Dihedral Angle between Planes I and J (Deg); Beta: Angle Cg(I)--Cg(J) or Cg(I)--Me vector and normal to plane I (Deg); Gamma: Angle Cg(I)--Cg(J) vector and normal to plane J (Deg).

| Cg(I)·····Cg(J) | D(Cg-Cg)   | Alpha | Beta | Gamma |
|-----------------|------------|-------|------|-------|
| Cg(1)·····Cg(2) | 5.330(2)   | 36    | 35.1 | 70.5  |
| Cg(1)·····Cg(3) | 3.7512(17) | 14    | 29.2 | 16.7  |
| Cg(1)·····Cg(3) | 3.7512(17) | 14    | 29.2 | 16.7  |
| Cg(2)·····Cg(1) | 5.778(3)   | 20    | 57.6 | 67.4  |
| Cg(2)·····Cg(2) | 3.7105(17) | 0     | 18.3 | 18.3  |
| Cg(2)·····Cg(3) | 4.927(2)   | 22    | 2.3  | 47.5  |
| Cg(2)·····Cg(3) | 4.927(2)   | 22    | 42.3 | 47.5  |
| Cg(3)·····Cg(1) | 3.7512(17) | 14    | 16.7 | 29.2  |
| Cg(3)·····Cg(1) | 3.7512(17) | 14    | 16.7 | 29.2  |
| Cg(3)·····Cg(2) | 4.927(2)   | 22    | 47.5 | 42.3  |
| Cg(3)·····Cg(2) | 4.927(2)   | 22    | 47.5 | 42.3  |

**Table S3.** Methanol adsorption capacity of different materials

| Material                                                                        | Ligand    | $q_{\max}(\text{g/g})$ | ref       |
|---------------------------------------------------------------------------------|-----------|------------------------|-----------|
| Co(pybz) <sub>2</sub>                                                           | pybz      | 0.23                   | 1         |
| Zn <sub>2</sub> (BDC) <sub>2</sub> (dabco)                                      | BDC/dabco | 0.21                   | 2         |
| MAF-5(Zn)                                                                       | eim       | 0.20                   | 3         |
| Cu <sub>2</sub> (dmcapz) <sub>2</sub>                                           | dmcapz    | 0.19                   | 4         |
| [Cd <sub>2</sub> (pbpy)(bdc) <sub>2</sub> Cl <sub>2</sub> ] · 5H <sub>2</sub> O | pbpy/bdc  | 0.18                   | 5         |
| Al(OH)-(1,4-NDC)                                                                | 1,4-NDC   | 0.16                   | 6         |
| [Cd <sub>2</sub> (pbpy)(bdc) <sub>2</sub> ClBr] · 9H <sub>2</sub> O             | pbpy/bdc  | 0.16                   | 5         |
| Zn <sub>5</sub> O <sub>2</sub> (bpdc) <sub>4</sub>                              | bpdc      | 0.15                   | 7         |
| ThrZnOAc                                                                        | Thr       | 0.15                   | 8         |
| Zn(tbip)                                                                        | Tbip      | 0.11                   | 9         |
| Cu <sub>2</sub> (pzdc) <sub>2</sub> (dpyg)                                      | Pzdc/dpyg | 0.11                   | 10        |
| CoDPE                                                                           | DPE       | 0.11                   | 11        |
| Co <sub>3</sub> (fa) <sub>6</sub>                                               | FA        | 0.10                   | 12        |
| Zn <sub>2</sub> (bptc)                                                          | Bptc      | 0.10                   | 13        |
| [Cd <sub>2</sub> (pbpy)(bdc) <sub>2</sub> Br <sub>2</sub> ] · 8H <sub>2</sub> O | pbpy/bdc  | 0.10                   | 5         |
| DPPB-2                                                                          | dppb      | 0.26                   | This work |

**Table S4.** Ethanol adsorption capacity of different materials

| Material                                                                        | Ligand        | $q_{\max}(\text{g/g})$ | ref       |
|---------------------------------------------------------------------------------|---------------|------------------------|-----------|
| MIL-100(Fe)                                                                     | TPA           | 0.34                   | 14        |
| Zn <sub>2</sub> (BDC) <sub>2</sub> (dabco)                                      | BDC/dabco     | 0.33                   | 2         |
| ZIF-8(Zn)                                                                       | mIm           | 0.28                   | 15        |
| ZIF-71(Zn)                                                                      | dcIm          | 0.28                   | 15        |
| ZIF-90(Zn)                                                                      | Ica           | 0.28                   | 15        |
| ZIF-68(Zn)                                                                      | nIm/blm       | 0.26                   | 16        |
| ([Eu(CAM)(HCAM)2Mn2(H <sub>2</sub> O)4]) <sub>n</sub>                           | (H)CAM        | 0.26                   | 17        |
| (H <sub>2</sub> dab)[Zn <sub>2</sub> (ox) <sub>3</sub> ]                        | ox/dab        | 0.26                   | 18        |
| MAF-2(Cu)                                                                       | etz           | 0.25                   | 19        |
| Zn <sub>2</sub> (NDC) <sub>2</sub> (dabco)                                      | 1,4-NDC/dabco | 0.20                   | 2         |
| [Cd <sub>2</sub> (pbpy)(bdc) <sub>2</sub> Cl <sub>2</sub> ] · 5H <sub>2</sub> O | pbpy/bdc      | 0.19                   | 5         |
| [Cd <sub>2</sub> (pbpy)(bdc) <sub>2</sub> ClBr] · 9H <sub>2</sub> O             | pbpy/bdc      | 0.16                   | 5         |
| Co <sub>3</sub> (fa) <sub>6</sub>                                               | FA            | 0.14                   | 1         |
| [Cd <sub>2</sub> (pbpy)(bdc) <sub>2</sub> Br <sub>2</sub> ] · 8H <sub>2</sub> O | pbpy/bdc      | 0.088                  | 5         |
| ([Ni(L6) <sub>2</sub> ] · 4H <sub>2</sub> O) <sub>n</sub>                       | L6            | 0.070                  | 20        |
| [Cd(L7)(DMF)]                                                                   | L7            | 0.060                  | 21        |
| DPPB-2                                                                          | dppb          | 0.37                   | This work |

**Table S5.** The selectivity of DPPB-2 for VOCs at 298K

| Type                                                             | Selectivity |
|------------------------------------------------------------------|-------------|
| C <sub>2</sub> H <sub>5</sub> OH/CHCl <sub>3</sub>               | 21.5        |
| C <sub>2</sub> H <sub>5</sub> OH/CH <sub>2</sub> Cl <sub>2</sub> | 19.4        |
| C <sub>2</sub> H <sub>5</sub> OH/EA                              | 25.1        |
| CH <sub>3</sub> OH/CHCl <sub>3</sub>                             | 15.6        |
| CH <sub>3</sub> OH/CH <sub>2</sub> Cl <sub>2</sub>               | 14.7        |
| CH <sub>3</sub> OH/EA                                            | 16.2        |

**Table S6.** Crystal data and structure refinement parameters for DPPB-1 or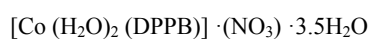

|                                   |                                                                     |                                          |
|-----------------------------------|---------------------------------------------------------------------|------------------------------------------|
| Formula                           | DPPB-1                                                              | □                                        |
| Empirical formula                 | C <sub>29</sub> H <sub>30</sub> Co N <sub>2</sub> O <sub>7.50</sub> |                                          |
| Formula weight                    | 585.48                                                              |                                          |
| Temperature                       | 296 K                                                               |                                          |
| Wavelength                        | 0.71073 Å                                                           |                                          |
| Crystal system                    | Monoclinic                                                          |                                          |
| Space group                       | C 1 2/c 1                                                           |                                          |
| Unit cell dimensions              | a = 15.715(7) Å<br>b = 23.065(9) Å<br>c = 9.764(4) Å                | a = 90°.<br>b = 108.308(7)°.<br>g = 90°. |
| Volume                            | 3360(2) Å <sup>3</sup>                                              |                                          |
| Z                                 | 4                                                                   |                                          |
| Density (calculated)              | 1.157 Mg/m <sup>3</sup>                                             |                                          |
| Absorption coefficient            | 0.553 mm <sup>-1</sup>                                              |                                          |
| F(000)                            | 1220                                                                |                                          |
| Crystal size                      | 0.12 x 0.1 x 0.08 mm <sup>3</sup>                                   |                                          |
| Theta range for data collection   | 2.819 to 27.814°.                                                   |                                          |
| Index ranges                      | -20 ≤ h ≤ 20, -30 ≤ k ≤ 27, -12 ≤ l ≤ 9                             |                                          |
| Reflections collected             | 13526                                                               |                                          |
| Independent reflections           | 3892 [R(int) = 0.0970]                                              |                                          |
| Completeness to theta = 25.242°   | 98.90%                                                              |                                          |
| Absorption correction             | Semi-empirical from equivalents                                     |                                          |
| Max. and min. transmission        | 0.7456 and 0.6495                                                   |                                          |
| Refinement method                 | Full-matrix-block least-squares on F <sup>2</sup>                   |                                          |
| Data / restraints / parameters    | 3892 / 18 / 198                                                     |                                          |
| Goodness-of-fit on F <sup>2</sup> | 0.884                                                               |                                          |
| Final R indices [I > 2σ(I)]       | R1 = 0.0606, wR2 = 0.1532                                           |                                          |
| R indices (all data)              | R1 = 0.1297, wR2 = 0.1914                                           |                                          |
| Extinction coefficient            | n/a                                                                 |                                          |

|                             |                                    |
|-----------------------------|------------------------------------|
| Largest diff. peak and hole | 0.550 and -0.464 e.Å <sup>-3</sup> |
|-----------------------------|------------------------------------|

**Table S7.** Atomic coordinates (x 10<sup>4</sup>) and equivalent isotropic displacement parameters (Å<sup>2</sup>x 10<sup>3</sup>) for DPPB-1. U(eq) is defined as one third of the trace of the orthogonalized Uij tensor.

|       | x     | y     | z     | U(eq)  |
|-------|-------|-------|-------|--------|
| Co(1) | 10000 | 9458  | 12500 | 41(1)  |
| O(1)  | 4522  | 5281  | 1415  | 44(1)  |
| O(2)  | 9051  | 9430  | 13533 | 53(1)  |
| N(1)  | 9137  | 8950  | 10860 | 44(1)  |
| C(1)  | 8429  | 9215  | 9913  | 62(1)  |
| C(2)  | 7840  | 8925  | 8766  | 60(1)  |
| C(3)  | 7954  | 8339  | 8548  | 44(1)  |
| C(4)  | 8670  | 8073  | 9534  | 46(1)  |
| C(5)  | 9249  | 8381  | 10651 | 47(1)  |
| C(6)  | 7345  | 8027  | 7294  | 43(1)  |
| C(7)  | 6982  | 8303  | 5959  | 55(1)  |
| C(8)  | 6442  | 8004  | 4778  | 51(1)  |
| C(9)  | 6215  | 7426  | 4900  | 38(1)  |
| C(10) | 6571  | 7152  | 6224  | 46(1)  |
| C(11) | 7131  | 7446  | 7395  | 48(1)  |
| C(12) | 5608  | 7111  | 3645  | 36(1)  |
| C(13) | 5000  | 7396  | 2500  | 38(1)  |
| C(14) | 5609  | 6506  | 3600  | 37(1)  |
| C(15) | 5000  | 6202  | 2500  | 32(1)  |
| C(16) | 5000  | 5557  | 2500  | 35(1)  |
| O(3)  | 7226  | 10470 | 7413  | 231(4) |
| O(4)  | 5934  | 8572  | 10422 | 202(6) |
| O(5)  | 5000  | 8118  | 7500  | 141(5) |

**Table S8.** Selected bonds lengths (Å) for DPPB-1

| Bond lengths | Å    | Bond lengths | Å    |
|--------------|------|--------------|------|
| Co(1)-O(1)   | 2.19 | O(1)-C(16)   | 1.26 |
| Co(1)-O(2)   | 2.05 | O(2)-H(2A)   | 0.96 |
| Co(1)-N(1)   | 2.1  | O(2)-H(2B)   | 0.96 |
|              |      | N(1)-C(1)    | 1.35 |
|              |      | N(1)-C(5)    | 1.35 |
|              |      | C(1)-H(1)    | 0.93 |
|              |      | C(1)-C(2)    | 1.38 |

---

## Reference

- (1) Zeng, M. H.; Tan, Y. X.; He, Y. P.; Yin, Z.; Chen, Q.; Kurmoo, M., A porous 4-fold-interpenetrated chiral framework exhibiting vapochromism, single-crystal-to-single-crystal solvent exchange, gas sorption, and a poisoning effect. *Inorg. Chem* **2013**, 52, (5), 2353-2360.
- (2) Uemura, K.; Komagawa, Y.; Yamasaki, Y.; Kita, H., Characterization of organic solvents adsorption/desorption on hydrophobic porous coordination polymers and their micro-crystals aggregation on mullite support. *Desalination* **2008**, 234, (1-3), 1-8.
- (3) Zhu, A. X.; Lin, R. B.; Qi, X. L.; Liu, Y.; Lin, Y. Y.; Zhang, J. P.; Chen, X. M., Zeolitic metal azolate frameworks (MAFs) from ZnO/Zn(OH)<sub>2</sub> and monoalkyl-substituted imidazoles and 1,2,4-triazoles: Efficient syntheses and properties. *Microporous Mesoporous Mater* **2012**, 157, (27), 42-49.
- (4) Quartapelle Procopio, E.; Fukushima, T.; Barea, P. E.; Navarro, P. J. A. R.; Horike, P. S.; Kitagawa, P. S., A Soft Copper(II) Porous Coordination Polymer with Unprecedented Aqua Bridge and Selective Adsorption Properties. *Chem. - Eur. J* **2012**, 18, (41), 13117-13125.
- (5) Chen, C.; Cai, L. X.; Tan, B.; Zhang, Y. J.; Yang, X. D.; Lin, S.; Zhang, J., Flexible Bipyridinium Constructed Porous Frameworks with Superior Broad-Spectrum Adsorption toward Organic Pollutants. *Cryst. Growth Des* **2017**, 17, (4), 1843-1848.
- (6) Comotti, A.; Bracco, S.; Sozzani, P.; Horike, S.; Matsuda, R.; Chen, J.; Takata, M.; Kubota, Y.; Kitagawa, S., Nanochannels of two distinct cross-sections in a porous Al-based coordination polymer. *J. Am. Chem. Soc* **2008**, 130, (41), 13664-13672.
- (7) Fang, Q. R.; Zhu, G. S.; Jin, Z.; Xue, M.; Wei, X.; Wang, D. J.; Qiu, S. L., A Novel Metal–Organic Framework with the Diamondoid Topology Constructed from Pentanuclear Zinc-Carboxylate Clusters. *Cryst. Growth Des* **2007**, 7, (6), 1035-1037.



- 
- (8) Kundu, T.; Sahoo, S. C.; Banerjee, R., Relating pore hydrophilicity with vapour adsorption capacity in a series of amino acid based metal organic frameworks. *CrystEngComm* **2013**, *15*, (45), 9634-9640.
- (9) Olson, D. H.; Parker, B., Zn(tbip) (H<sub>2</sub>tbip = 5-tert-Butyl Isophthalic Acid): A Highly Stable Guest-Free Microporous Metal Organic Framework with Unique Gas Separation Capability. *J. Am. Chem. Soc* **2006**, *128*, (13), 4180-4181.
- (10) Kitaura, R.; Fujimoto, K.; Noro, S.; Kondo, M.; Kitagawa, S., A pillared-layer coordination polymer network displaying hysteretic sorption: [Cu(2)(pzdc)(2)(dpyg)](n) (pzdc= pyrazine-2,3-dicarboxylate; dpyg=1,2-Di(4-pyridyl)glycol). *Angew. Chem., Int. Ed* **2002**, *41*, (1), 133-135.
- (11) Hou, C.; Liu, Q.; Okamura, T.; Wang, P.; Sun, W. Y., Dynamic porous metal-organic frameworks: synthesis, structure and sorption property. *CrystEngComm* **2012**, *14*, (24), 8569-8576.
- (12) Li, K.; Olson, D. H.; Lee, J. Y.; Bi, W.; Wu, K.; Yuen, T.; Xu, Q.; Li, J., Multifunctional Microporous MOFs Exhibiting Gas/Hydrocarbon Adsorption Selectivity, Separation Capability and Three-Dimensional Magnetic Ordering. *Adv. Funct. Mater* **2010**, *18*, (15), 2205-2214.
- (13) Lin, X.; Blake, A. J.; Wilson, C.; Sun, X. Z.; Champness, N. R.; George, M. W.; Hubberstey, P.; Mokaya, R.; Schröder, M., A porous framework polymer based on a zinc(II) 4,4'-bipyridine-2,6,2',6'-tetracarboxylate: synthesis, structure, and "zeolite-like" behaviors. *J. Am. Chem. Soc* **2006**, *128*, (33), 10745-10753.
- (14) Seo, Y. K.; Ji, W. Y.; Ji, S. L.; Lee, U. H.; Hwang, Y. K.; Jun, C. H.; Horcajada, P.; Serre, C.; Chang, J. S., Large scale fluorine-free synthesis of hierarchically porous iron(III) trimesate MIL-100(Fe) with a zeolite MTN topology. *Microporous Mesoporous Mater* **2012**, *157*, (27), 137-145.
- (15) Zhang, K.; Lively, R. P.; Dose, M. E.; Brown, A. J.; Zhang, C.; Chung, J.; Nair, S.; Koros, W. J.; Chance, R. R., Alcohol and water adsorption in zeolitic imidazolate frameworks. *Chem. Commun* **2013**,

---

49, (31), 3245-3257.

(16) Van, d. P. S.; Van, A. T.; Bozbiyik, B.; Lannoeye, J.; De Vos, D. E.; Baron, G. V.; Denayer, J. F.,

Adsorptive characterization of the ZIF-68 metal-organic framework: a complex structure with amphiphilic properties. *Langmuir* **2014**, 30, (28), 8416-8424.

(17) Z, N.; S, F.; JG, M.; XP, Z.; P, C., Enhancement of adsorption selectivity for MOFs under mild activation and regeneration conditions. *Chem. Commun* **2014**, 50, (58), 7797-7799.

(18) Sadakiyo, M.; Yamada, T.; Kitagawa, H., Hydroxyl group recognition by hydrogen-bonding donor and acceptor sites embedded in a layered metal-organic framework. *J. Am. Chem. Soc* **2011**, 133, (29), 11050-11053.

(19) Zhang, J. P.; Chen, X. M., Exceptional framework flexibility and sorption behavior of a multifunctional porous cuprous triazolate framework. *J. Am. Chem. Soc* **2008**, 130, (18), 6010-6017.

(20) Hou, C.; Liu, Q.; Wang, P.; Sun, W. Y., Porous metal-organic frameworks with high stability and selective sorption for CO<sub>2</sub> over N<sub>2</sub>. *Microporous Mesoporous Mater* **2013**, 172, (172), 61-66.

(21) Huang, Y.; Zheng, X.; Duan, J.; Liu, W.; Zhou, L.; Wang, C.; Wen, L.; Zhao, J.; Li, D., A highly stable multifunctional three-dimensional microporous framework: excellent selective sorption and visible photoluminescence. *Dalton Trans* **2014**, 43, (18), 6811-6818.
